# Supplementary figures and images for: TheHECATEgenes regulate female reproductive tract development inArabidopsis thaliana
Source: Oxford University Press journal article supplement (doi:10.1242/dev.011510), 2007-09-14

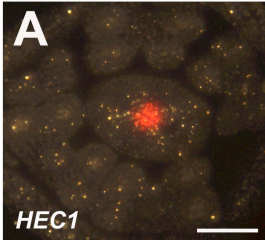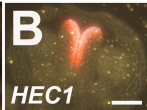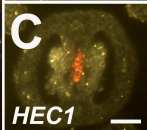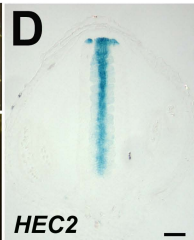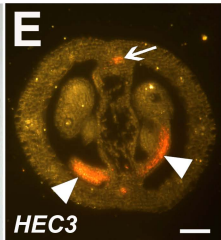

Supplement: dev011510-sup-011510-figs1.pdf [file dev011510-sup-011510-figs1.pdf]

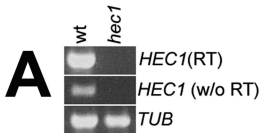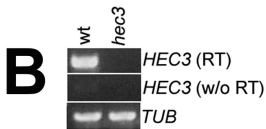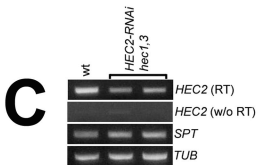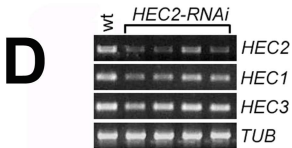

Supplement: dev011510-sup-011510-figs2.pdf [file dev011510-sup-011510-figs2.pdf]

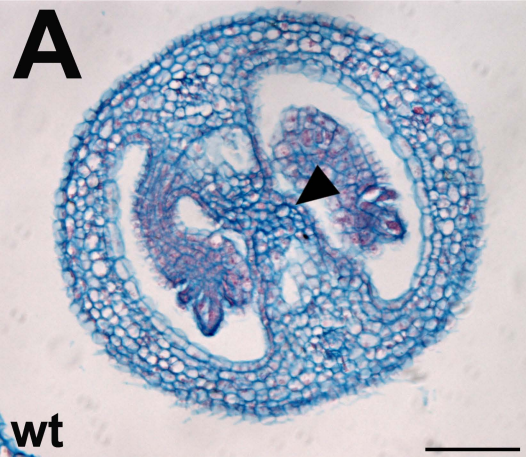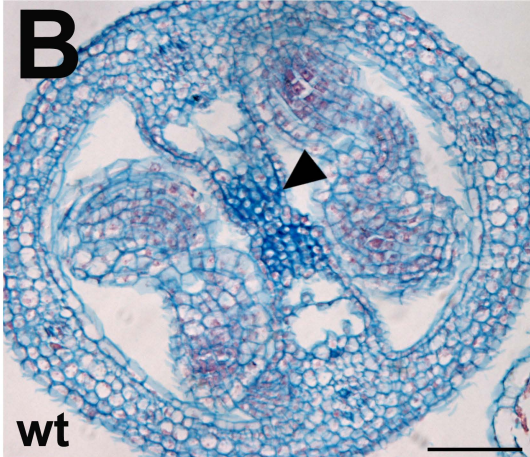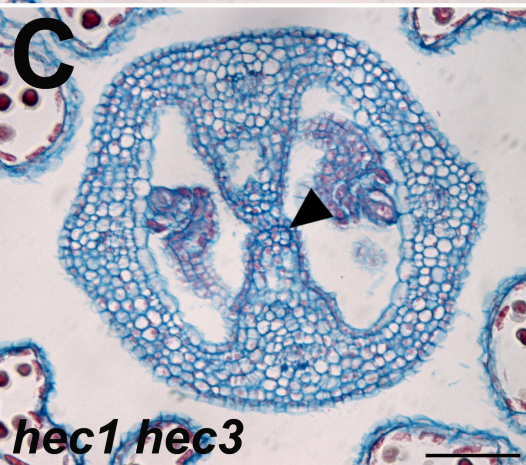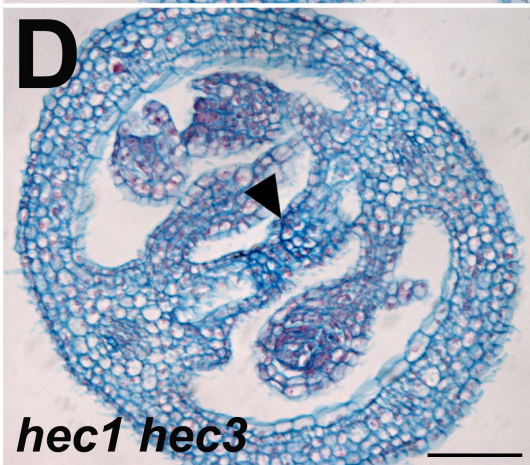

Supplement: dev011510-sup-011510-figs3.pdf [file dev011510-sup-011510-figs3.pdf]
